# Computational Investigation Of Blood Flow And Flow-mediated Transport In Arterial Thrombus Neighborhood

Chayut Teeraratkul <sup>\*1</sup>, Zachariah Irwin <sup>†1</sup>, Shawn C. Shadden <sup>‡2</sup> & Debanjan Mukherjee <sup>§1</sup>

<sup>1</sup>Department of Mechanical Engineering, University of Colorado Boulder

<sup>2</sup>Department of Mechanical Engineering, University of California, Berkeley

## Abstract

A pathologically formed blood clot or thrombus is central to major cardiovascular diseases like heart attack and stroke. Detailed quantitative evaluation of flow and flow-mediated transport processes in the thrombus neighborhood within large artery hemodynamics is crucial for understanding disease progression and assessing treatment efficacy. This, however, remains a challenging task owing to the complexity of pulsatile viscous flow interactions with arbitrary shape and heterogeneous microstructure of realistic thrombi. Here, we address this challenge by conducting a systematic parametric simulation based study on characterizing unsteady hemodynamics and flow-mediated transport in the neighborhood of an arterial thrombus. We use a hybrid particle-continuum based finite element approach to handle arbitrary thrombus shape and microstructural variations. Results from a cohort of 50 different unsteady flow scenarios are presented, including unsteady vortical structures, pressure-gradient across the thrombus boundary, finite time Lyapunov exponents, and dynamic coherent structures that organize advective transport. We clearly illustrate the synergistic influence of three key parameters - thrombus shape, microstructure, and extent of wall disease - in terms of: (a) determining hemodynamic features in the thrombus neighborhood; and (b) governing the balance between advection, permeation, and diffusion to regulate transport processes in the thrombus neighborhood.

**Keywords:** *thrombosis; hemodynamics; discrete element; fictitious domain; transport processes*

---

\*chayut.teeraratkul@colorado.edu

†zachariah.irwin@colorado.edu

‡shadden@berkeley.edu

§Corresponding Author: debanjan@colorado.edu

# 1 Introduction

According to latest statistics from the American Heart Association [50], cardiovascular diseases like heart attack and stroke continue to be a leading global cause of death – accounting for over 800,000 deaths annually in the United States alone. Pathological clotting of blood, also referred to as Thrombosis, is a primary cause or complication in stroke and coronary heart disease [21,53]. Thrombotic phenomena in patients are intimately related to blood flow, transport, and flow-induced forces [55,20,33,15]. Unsteady pulsatile viscous blood flow in the neighborhood of a thrombus - a pathologically formed clot - can determine the transport of platelets and coagulation proteins, as well as thrombolytic drug during therapy [14,5]. Flow-induced forces on the thrombus are known to influence thrombus volume and growth, as well as fragmentation and thrombo-embolization risks [3,12,2,17,18]. A comprehensive assessment of flow and flow-mediated transport in the thrombus neighborhood is therefore critical for understanding disease progression and thrombolytic treatment efficacy, and yet remains a challenging task. A key underlying challenge comprises understanding the interaction of unsteady pulsatile hemodynamics with realistic human thrombi of arbitrary shape and heterogeneous morphology and microstructure. Real human thrombi are known to be composite, with platelets and fibrin strands constituting primary ingredients [54,52,62,51]. The interconnected interstitial space in the thrombus interior leads to permeability of the thrombus at the macroscale, which is an important parameter for thrombus biomechanics and transport phenomena [56,4]. Several prior studies have advanced our understanding of flow and transport processes in thrombus micro-environment in microscale thrombi through experiments conducted using mouse injury models [33,52], and microfluidic flow systems [32,60]. Computer simulations have provided a viable alternative to complement experimental assays and imaging studies, having been used to model both microscale [37,57,58,44,46,59] and macroscopic [27,28,36,61] thrombus biomechanics and biotransport phenomena. Handling large artery hemodynamics interactions with arbitrary shape and heterogeneous microstructures has remained a challenge in existing computational approaches. In prior work, we developed a hybrid particle-continuum fictitious domain computational method for addressing this state-of-the-art challenge [31]. This method enables easy representation of shape and microstructural features, as well as parametric variations thereof, by using a discrete particle description of the thrombus which is embedded weakly into a continuous background fluid mesh. Here, we use the particle-continuum approach to conduct a parametric simulation study on flow and flow-mediated transport in the thrombus neighborhood within flow environments mimicking that of large artery hemodynamics. Specifically, our objectives are to: (a) characterize key features of the unsteady flow environment around arterial thrombi; (b) illustrate how key parameters like thrombus shape, microstructure, and wall leakage due to disease influence flow and transport; and (c) quantitatively establish the various ways in which flow mediates transport within and outside the thrombus.

## 2 Methods

### 2.1 Hybrid particle-continuum finite element hemodynamics model

Pulsatile viscous flow of blood in the neighborhood of an arbitrary thrombus was modeled using a hybrid particle-continuum numerical approach based on a stabilized fictitious domain finite element framework we have devised in prior work [31]. Details of the formulation are not reproduced here for conciseness. Briefly, we assume an overall background fluid domain within which the thrombus is embedded (see Figure 1), instead of meshing the fluid and the thrombus as separate domains with a mesh that conforms with the thrombus boundary. Assuming that blood is a Newtonian fluid, we solved the Navier-stokes equations for fluid momentum balance, and continuity equation for mass balance, using a Petrov-Galerkin stabilized finite

element formulation [7,16]. The variational form for this finite element formulation is given as follows:

$$\begin{aligned} & \rho_f \left( \underline{\mathbf{w}}, \frac{\partial \underline{\mathbf{u}}}{\partial t} \right)_{\Omega} + \rho_f (\underline{\mathbf{w}}, \underline{\mathbf{u}} \cdot \nabla \underline{\mathbf{u}})_{\Omega} + 2\mu_f (\underline{\mathbf{D}}(\underline{\mathbf{w}}), \underline{\mathbf{D}}(\underline{\mathbf{u}}))_{\Omega} - \rho_f (\underline{\mathbf{w}}, \underline{\mathbf{b}})_{\Omega} - (\underline{\mathbf{w}}, \underline{\mathbf{h}})_{\Gamma_n} \\ & - (\nabla \cdot \underline{\mathbf{w}}, p)_{\Omega} - (q, \nabla \cdot \underline{\mathbf{u}})_{\Omega} + a_{int}(\underline{\mathbf{u}}, \underline{\mathbf{w}}) \\ & + (\tau (\underline{\mathbf{u}}^h \cdot \nabla \underline{\mathbf{w}}^h), \mathcal{R}^h)_{\Omega^h} + (\tau \nabla q^h, \mathcal{R}^h)_{\Omega^h} = 0 \end{aligned} \quad (1)$$

where  $(a, b)_{\Omega} \equiv \int a \cdot b d\Omega$ ;  $\underline{\mathbf{u}}$  and  $p$  are the flow velocity and pressure;  $\underline{\mathbf{w}}$  and  $q$  are the respective velocity and pressure test functions;  $\underline{\mathbf{D}}$  denotes the strain rate tensor; and  $\mathcal{R}^h$  is the residual of the momentum and mass balance equations. The last two terms in the formulation represent contributions towards Petrov-Galerkin stabilization for convective phenomena and linear pressure-velocity interpolation respectively. The stabilization parameter  $\tau$  was chosen as specified in prior work [31]. Contributions from resistance and Windkessel based boundary conditions, typical in vascular hemodynamics modeling, were accounted for through  $\underline{\mathbf{h}}$ . For example, a resistance boundary condition (with resistance value  $R_m$ ) over a part of the boundary  $\Gamma_m$  can be formulated as follows:

$$(\underline{\mathbf{w}}, \underline{\mathbf{h}})_{\Omega} = (w, -p\hat{\mathbf{n}})_{\Omega} = \left( \underline{\mathbf{w}}, -R_m \left[ \int \underline{\mathbf{u}}(t) \cdot \hat{\mathbf{n}} d\Gamma \right] \hat{\mathbf{n}} \right)_{\Gamma_m} \quad (2)$$

and we refer to [49] and [23] for further relevant details regarding mathematical formulation of such boundary conditions. For the fictitious domain formulation [31], coupled interaction between the thrombus and the flow domains was handled using custom coupling terms  $a_{int}(\underline{\mathbf{u}}, \underline{\mathbf{w}})$ . Here we employed the penalty-function approach formulated in [31], where the fluid velocity ( $\underline{\mathbf{u}}$ ) is constrained to take-up the local velocity ( $\underline{\mathbf{v}}_0$ ) within the thrombus domain ( $\Omega_T$ ):

$$a_{int}(\underline{\mathbf{u}}, \underline{\mathbf{w}}) = \int_{\Omega_T} \kappa (\underline{\mathbf{u}} - \underline{\mathbf{v}}_0) \cdot \underline{\mathbf{w}} d\Omega \quad (3)$$

with  $\kappa$  being a penalty parameter chosen based on element size  $h$  locally as follows:

$$\kappa = c_1 \max \left( \frac{\rho_f \|\underline{\mathbf{u}} - \underline{\mathbf{v}}_0\|}{h}, \frac{\mu_f}{h^2} \right) \quad (4)$$

In this study, we used  $c_1 = 500.0$  for all simulations. In accordance with the hybrid particle-continuum approach, the thrombus domain  $\Omega_T$  was modeled using a collection of mesh-free, off-lattice, discrete elements  $\mathcal{P}_i$  such that:  $\Omega_T \approx \mathcal{P}_1 \oplus \mathcal{P}_2 + \dots + \mathcal{P}_N$ . This approach has been demonstrated to be effective at handling the arbitrary shape and heterogeneous microstructure of physiologically realistic thrombi [31]. While the original formulation presented in [31] models each discrete element  $\mathcal{P}_i$  as a generalized superquadric geometry, for the purpose of this study, we modeled  $\mathcal{P}_i$  as individual spherical particles. For each element, the formulation used the sphere definition, to identify whether a finite element quadrature point is ‘inside’ or ‘outside’ the thrombus domain. For all points located ‘inside’ - the fictitious domain penalty contributions were assembled into the global matrix system for the fluid flow problem.

## 2.2 Modeling thrombus microstructure variations

We used the framework devised in prior work [31] to reconstruct a thrombus using discrete elements. Briefly, this framework relies on post-processing of thrombus image data (medical images or microscopy images); identification of thrombus manifold geometry via image-segmentation; identification of additional spatial composition information if available; and feeding the thrombus data into a geometric tessellation based algorithm to create a discrete particle reconstruction of the thrombus domain. The resultant reconstruction represents a coarsened, mesoscopic approximation of the thrombus internal domain, with an effective mesoscale porosity and pore-space network. The discrete element reconstruction enables flexible modeling of a range of microstructural variations in the thrombus interior. One approach is to modify the shape of each

discrete element in a parametric manner, as described in [31]. Here, we devised a set of additional basic operations to account for a wider range of microstructures (see for reference Figure 1). These operations involved: (a) growing or shrinking a randomly selected subset of discrete elements by a random growth/shrinkage factor; (b) inserting or deleting discrete elements from a randomized selection of locations; (c) perturbing the location of a randomly selected subset of discrete elements. Using a baseline discrete element reconstruction from microscopy image data, a set of arbitrary sequences of growth–shrinkage, insertion–deletion, and perturbation operations were used to generate a range of microstructural variants for the same thrombus - keeping the overall shape and size of the thrombus fixed.

### 2.3 Modeling of diseased wall state

Diseased vessel wall status was modeled conceptually in form of a pervious or leaky wall at the base of the thrombus. This rationale was based on discussions in existing literature such as [47]. Extent of leakage was scaled with respect to the total incoming volumetric flow at the channel inlet as shown below:

$$Q_{leak}(t) = \alpha Q_{inlet}(t) ; \mathbf{u}_{leak}(t) = \left( \frac{Q_{leak}(t)}{A_{base}} \right) \hat{\mathbf{n}}_{wall} = \left( \alpha \frac{Q_{inlet}(t)}{A_{base}} \right) \hat{\mathbf{n}}_{wall} \quad (5)$$

where  $Q_{inlet}$  is the total inlet flow rate;  $A_{base}$  is the area of the wall along the base of the thrombus (that is, diseased wall area); and  $\hat{\mathbf{n}}_{wall}$  is the outward normal from the vessel wall at the thrombus site. The average velocity derived from this leakage flow rate was then imposed along the vessel wall at the base of the thrombus as a Dirichlet boundary condition within the fictitious domain finite element formulation. The concept is illustrated in Figure 1. This simple method has two distinct advantages. First, the extent of disease or damage to the wall is characterized by a single parameter  $\alpha$  which has a direct phenomenological interpretation. Second, the methodology is easily applicable in both 2D and 3D geometries, enabling extension to real arterial geometries as long as the clot location is identifiable (for example, using image data).

### 2.4 Lagrangian computation of Finite Time Lyapunov Exponent (FTLE) field

For a given flow velocity field data, we adopted a Cartesian grid based tracer integration approach to compute the Finite Time Lyapunov Exponent (FTLE) field as devised extensively in prior works by Shadden et.al. [42,41,39]. Specifically, a Cartesian grid of massless Lagrangian tracers were seeded in the interior of the flow domain. For our fictitious domain approach, the Cartesian grid covered the interior of the fictitious thrombus domain. The position of each tracer was integrated based on the flow velocity interpolated at the location of the tracer at each instant as follows:

$$\mathbf{x}[i][j][k](t) = \mathbf{x}[i][j][k](t_0) + \int_{t_0}^t \mathbf{u}[i][j][k] dt \quad (6)$$

where we have used the notation  $[i][j][k]$  to denote indexing based on the Cartesian grid used for the computation. The integration in Equation 6 was evaluated numerically using a one-step explicit four stage Runge-Kutta method. As discussed in several published works, locating the cell/element where the tracer resides at a given instant for integration of its velocity can be a non-trivial and time-consuming task, especially for unstructured meshes of complex geometries. Here, we mitigate this complexity by using a cell-walking algorithm for simplicial elements (triangles in 2D, tetrahedra in 3D) as proposed in [22], which relies on an algebraic check based on the tracer coordinates and element node coordinates. Considering the original seed coordinates  $\mathbf{x}[i][j][k](t_0)$  as the reference configuration, and the mapped coordinates due to the flow at time  $t - \mathbf{x}[i][j][k](t)$  - as the current configuration, we defined a deformation gradient  $\underline{\mathbf{F}}$  for the tracer kinematics

as follows, based on the formulation presented in [39]:

$$\begin{aligned} \underline{\underline{\mathbf{F}}} &\approx \frac{\Delta \underline{\mathbf{x}}[i][j][k](t)}{\Delta \underline{\mathbf{x}}[i][j][k](t_0)} \\ &= \begin{bmatrix} \frac{x[i+1][j][k](t) - x[i-1][j][k](t)}{x[i+1][j][k](t_0) - x[i-1][j][k](t_0)} & \frac{x[i][j+1][k](t) - x[i][j-1][k](t)}{y[i][j+1][k](t_0) - y[i][j-1][k](t_0)} & \frac{x[i][j][k+1](t) - x[i][j][k-1](t)}{z[i][j][k+1](t_0) - z[i][j][k-1](t_0)} \\ \frac{y[i+1][j][k](t) - y[i-1][j][k](t)}{x[i+1][j][k](t_0) - x[i-1][j][k](t_0)} & \frac{y[i][j+1][k](t) - y[i][j-1][k](t)}{y[i][j+1][k](t_0) - y[i][j-1][k](t_0)} & \frac{y[i][j][k+1](t) - y[i][j][k-1](t)}{z[i][j][k+1](t_0) - z[i][j][k-1](t_0)} \\ \frac{z[i+1][j][k](t) - z[i-1][j][k](t)}{x[i+1][j][k](t_0) - x[i-1][j][k](t_0)} & \frac{z[i][j+1][k](t) - z[i][j-1][k](t)}{y[i][j+1][k](t_0) - y[i][j-1][k](t_0)} & \frac{z[i][j][k+1](t) - z[i][j][k-1](t)}{z[i][j][k+1](t_0) - z[i][j][k-1](t_0)} \end{bmatrix} \end{aligned} \quad (7)$$

The right Cauchy-Green deformation tensor was then computed as follows:

$$\underline{\underline{\mathbf{C}}} = \underline{\underline{\mathbf{F}}}^T \cdot \underline{\underline{\mathbf{F}}} \quad (8)$$

and subsequently, the FTLE field values were calculated as a scaled version of the natural logarithm of the square root of the maximal eigenvalue of the right Cauchy-Green deformation tensor as follows:

$$\text{FTLE}(\underline{\underline{\mathbf{x}}}[i][j][k](t_0)) = \frac{1}{|t - t_0|} \log \left[ \sqrt{\max(\lambda_C)} \right] \quad (9)$$

with  $\lambda_C$  denoting eigenvalues of the tensor  $\underline{\underline{\mathbf{C}}}$ . The computed FTLE field was mapped back onto the original Cartesian grid where tracers were seeded (hence the notation on the left hand side of Equation 9).

## 2.5 Extraction of FTLE ridges

Ridges of the FTLE field define coherent structures that organize advective mass transport [42]. For this study, we used the 2-dimensional Cartesian structured grid data of the FTLE field, and interpret them as pixels of an image for identifying ridges in the transformed FTLE pixel intensity data. Using the Scikit-Image [48] library in Python, we computed 2-dimensional Hessian matrix and the corresponding Hessian eigenvalues of the pixel intensity distribution. This was followed by a thresholding of pixels based on the computed eigenvalues using the Otsu method [35,29] to identify the ridges in the images, quantified in whole pixel units. FTLE fields were pre-processed into portable natural graphics (png) formatted images at high dpi values, and cropped to field view, prior to employing these image-based operations.

## 2.6 Model system and design of experiments

The model system for this study comprised a rectangular channel domain with width equivalent to that of the human common carotid artery ( $\approx 6.0 \text{ mm}$ ), and length equal to 5 times the width. Blood was modeled as a Newtonian fluid with constant density  $\rho_f = 1.06 \text{ g/cc}$ , and bulk viscosity  $\mu_f = 4.0 \text{ cP}$ . A pulsatile inflow profile was specified at the channel inlet, based on measured common carotid artery flow profile data available in literature [26]. A set of realistic thrombus morphology images obtained from human whole blood clotting experiments as reported in [12] was processed using the framework described in Section 2.2. The thrombus aggregate dimensions were scaled up to arterial scales while preserving their overall shape and bounding box aspect ratio. Using the techniques outlined in Section 2.2 a set of 6 microstructure models were generated for each of the 2 clot specimen in [12], leading to 12 thrombus models as illustrated in Figure 2. For each model, four different scenarios for diseased wall status were considered corresponding to  $\alpha = 0.0, 0.1, 0.2, 0.4$  - that is, 0%, 10%, 20%, and 40% leakage flow across the diseased wall respectively. We remark here that the case with  $\alpha = 0.0$  will also correspond to microfluidic devices with fixed impermeable channel geometries. In addition, for each of the two clots, a separate case was considered where the clot boundary was modeled as a purely rigid, impermeable, no-slip boundary wall. For each of the 50 resulting cases, unsteady hemodynamics was simulated for three cardiac cycles using the fictitious domain finite element method (Section 2.1). Subsequently, FTLE fields were computed using the flow velocity data from the final cardiac cycle using the tracer integration approach in Section 2.3.

## 3 Results

### 3.1 Unsteady hemodynamics in the thrombus neighborhood

Computed unsteady flow patterns were visualized for the final cardiac cycle for each of the numerical experiments undertaken for this study. Flow patterns were visualized using surface line integration convolution (LIC), which is a texture advection based visualization technique for vector fields that clearly demarcates local rotational or vortical regions [8] in addition to velocity magnitudes (based on LIC color). Figure 3 presents LIC patterns colored by velocity magnitude for varying extents of wall leakage ( $\alpha$ ) at peak systole for thrombus models M-1-X. Figure 4 presents the same for models M-2-X. Additional figures presenting flow LIC visualizations for mid-systolic acceleration, peak systole, and mid-systolic deceleration (*refer Figure 1 for flow profile*) are provided for both sets of thrombus models in the Supplementary Material (*see Figures S1 and S2 as well as supplementary animations*). We observe that, for fixed clot shape and fixed wall leakage parameter, the larger scale hemodynamic patterns, vortical structures, and recirculation features show minimal variations. However, variation in the extent of wall leakage significantly affects the unsteady hemodynamic patterns in the thrombus neighborhood. To further illustrate, and support, this observation, we quantified the difference in velocity fields by comparing the flow velocities around M-1-X and M-2-X to those obtained from unsteady flow computations around a purely rigid and impermeable thrombus boundary (modeled as a hole in the domain with boundaries matching the thrombus manifold geometry). The differences in local flow velocity magnitudes were integrated across the entire fluid domain outside the thrombus, and the time-varying integrated velocity differences for models M-1-X are presented in Figure 5 (*equivalent plot for M-2-X models included in Supplementary Material Figure S3*). As seen in the time varying differences, as well as the maximum values for each microstructure-leakage combination (inset), variations across the different microstructures are significantly small. Together, these results clearly indicate that thrombus shape, microstructure, and wall condition all can influence macroscale unsteady flow. However, microstructure leads to much smaller variations in larger scale flow patterns. Therefore to a first-order, overall thrombus shape and wall conditions at the thrombus have a significantly greater influence on larger-scale flow structures than finer thrombus microstructure.

### 3.2 Pressure gradient across the thrombus boundary

Pressure gradient across the thrombus domain is an important driver for flow-mediated permeation into the thrombus interior. Based on velocity and pressure data for each of the numerical experiments, we computed pressure gradient across the thrombus boundary, in a direction normal to the boundary, at successively varying locations along the thrombus geometry. We refer to this here as the thrombus boundary pressure gradient or TBPG. Figure 6 illustrates the normalized values of computed TBPG - averaged in time over one cardiac cycle - plotted along the longitudinal span of the thrombus domain for varying microstructures and varying wall leakage parameter ( $\alpha$ ). Positive values of TBPG here indicate a pressure gradient favoring flow permeation and flow-mediated transport into the clot. Negative values, on the contrary, denote adverse pressure gradients for flow permeation. The time-averaged TBPG was integrated along the fluid-thrombus interface boundary for every combination of shape, microstructure, and wall leakage parameter. Resulting data for thrombus models M-1-X and M-2-X are presented in Figure 7. Increase in extent of wall leakage, in the absence of any other thrombus structure modifications, is seen to increase the pressure gradient across the thrombus. For each wall leakage parameter, we computed the mean and coefficient of variation of the resultant integrated time-averaged TBPG value across all microstructures. This is illustrated in Figure 7 as well. Together, Figures 6 and 7 illustrate the combinatoric influence of thrombus shape, thrombus microstructure, and wall leakage on pressure-gradient across the thrombus, and the resultant potential for flow permeation in the unsteady arterial hemodynamic environment. The TBPG, and resulting pressure-driven permeation, is non-uniform along the thrombus boundary, which is in agreement with prior studies [13, 5]. We observe that thrombus shape influences the locations and extent of positive TBPG significantly. Specifically, at points along the geometry where the viscous flow separates (*marked in Figure 6 with red dotted lines*) we observe a sharp change in pressure gradient. This agrees with expectations based on

fluid mechanical considerations of viscous boundary layer and flow separation. Additionally, the effect of microstructural variations are more visible in the resultant TBPG values than in the resultant large-scale flow patterns. Specifically, from Figure 7, we observe that the coefficient of variation in TBPG values across all microstructures is an order of magnitude higher for cases where  $\alpha = 0$  (that is, no wall leakage) when compared to cases with non-zero  $\alpha$ . For all cases with non-zero  $\alpha$ , the variability in TBPG increases with increasing  $\alpha$ . These observations indicate that the thrombus microstructure plays a noticeable role in determining the extent of flow-mediated permeation into the thrombus.

### 3.3 Dynamic FTLE fields and coherent structures

The Finite Time Lyapunov Exponent (FTLE) values and the corresponding ridges in the FTLE scalar-field were computed as outlined in Sections 2.4 and 2.5 respectively, using velocity fields from each simulation case. In accordance with flow velocity around the thrombus, the FTLE data also showed minimal variations across varying microstructures when the thrombus shape and wall leakage parameter ( $\alpha$ ) were held fixed. Hence, resulting FTLE field, and FTLE ridges, are presented for varying clot shape and leakage for one of the representative thrombus models (M-1-1 and M-2-1) in Figures 8 and 9 respectively. The figures illustrate the FTLE data at three instants in the cardiac cycle - mid-systolic acceleration, peak systole, mid-systolic deceleration - thereby illustrating the inherently dynamic evolution of the coherent structures forming around the thrombus. We note that the FTLE data presented in these figures are not scaled by integration time for easy identification of the ridges. In all cases, the thrombus boundary itself constitutes a ridge. The presence of some non-zero FTLE data in the thrombus interior is, for these cases, an artifact induced due to the fictitious domain formulation, and does not change the interpretation of the resulting FTLE data external to the thrombus. We observe pronounced ridges forming both proximal and distal to the thrombus domain. The ridge structures formed proximal to the thrombus widens with increasing wall leakage ( $\alpha$ ). Distal to the thrombus, ridge structures formed follow the flow separation and reattachment dynamics, and in general get compressed closer to the thrombus domain with increasing wall leakage. Overall, a continuous enveloping FTLE ridge structure is seen to surround the thrombus in all cases, running along the thrombus length from the proximal to the distal end. Resulting flow separation and vortex dynamics also leads to pronounced FTLE ridges forming on the channel wall away from the thrombus at the distal end. The unsteady structures formed by the FTLE ridges demonstrate similarity to unsteady FTLE patterns around arterial stenosis model presented in 40, which is expected based on considerations of viscous flow separation at narrowed segments of the artery as also observed in current study. We also remark that these structures show marked differences in extent and complexity from those obtained around microscale thrombi as shown in 58 (one of the first studies to compute FTLE and coherent structures around a thrombus). FTLE ridges constitute pockets and barriers for advective transport phenomena 42,19. These results therefore indicate that the unsteady pulsatile flow, upon encountering a realistic thrombus, will generate dynamic coherent structures that organize mass transport in the thrombus neighborhood. This mass transport organization depends upon thrombus shape and size, as well as state of wall disease. In addition, it has been shown in prior work 40 that coherent structures formed by FTLE ridges are locations where integrated strain on blood-borne elements (eg. platelets) is maximized. This has key implications in mechanical platelet activation phenomena, which subsequently influences further thrombus growth and thrombosis disease progression.

## 4 Discussion

### 4.1 Synergistic interplay of factors characterizing near-thrombus environment

In this study, we have characterized the thrombus microenvironment using three parameters: shape, microstructure, and wall disease. Our simulations illustrate the synergistic interplay of these parameters in determining unsteady flow and flow-mediated transport in the thrombus neighborhood. Specifically, wall disease state can influence the extent of flow leakage from the thrombus site, which in turn influences the pressure gradient across the thrombus. This further influences the unsteady flow around thrombus boundary

and the resulting larger scale vortex generation and recirculation. As we illustrated here, these unsteady flow features lead to formation of local pockets and barriers for transport. Variations in vortical structures with varying wall leakage can be interpreted using known fluid mechanical theories of viscous boundary layers evolving over porous surfaces with suction [6,45,38]. Presence of wall leakage draws flow in to the clot across the permeable wall, which mimics flow suction from the viscous boundary layer. Removal of flow from the boundary layer thins and stabilizes the layer, resulting in delayed or reduced extent of flow separation [38]. This is in accordance with the observations from our numerical experiments. We remark here that our study focuses on phenomena in the neighborhood of a thrombus that has already formed, and is stable. Arterial thrombi can be unstable and fragment or embolize due to flow-induced forces [18], a phenomena that we are currently investigating. During thrombus formation and growth, the synergistic interplay of the flow and wall-disease state also constitutes a crucial factor. Wall disease state influences the trans-thrombus pressure gradient, which affects flow and shear, thereby influencing the microstructure and shape of the thrombus [5,47] as it grows.

## 4.2 Assembling a flow physics concept map for thrombus neighborhood

The simulation study provides deep insights into the various flow physics aspects that govern phenomena in the thrombus neighborhood in arterial flow environments. The various results and interpretations can be synthesized into a unifying concept map that elucidates flow-mediated transport phenomena in the thrombus neighborhood. We have illustrated this synthesized concept map in Figure 10. The Peclet number is a key non-dimensional descriptor for mass transport defined as  $Pe = UL/D$  for a flow with characteristic velocity  $U$ , length-scale  $L$ , and a species with mass diffusion coefficient  $D$ . The Peclet number, therefore, describes the ratio between extent of advective and diffusive mass transport. As shown here, unsteady, pulsatile, viscous flow interacting with realistic thrombus shapes lead to fast flow with complex vortical structures around the thrombus. These flow structures in turn result in coherent manifolds or barriers that organize advective mass transport outside the thrombus. These higher velocity flow structures result in high Peclet number advection-dominant transport phenomena outside the thrombus. Pressure-gradient induced by the flow at the thrombus boundary drives permeation across the thrombus into the thrombus interstices. As demonstrated in our prior work [31], and other studies [24,52,30], once permeation brings flow and biochemical species into the thrombus, the small interstitial spaces in the microstructure substantially slows the flow, generating a low Peclet number diffusion dominant transport regime. Flow-mediated transport in thrombus neighborhoods thus comprise a combinatoric interaction of advection, diffusion, and permeation. This interplay is strongly influenced by the boundary and the trans-boundary pressure gradient. Wall disease state may induce leakage, thereby changing the boundary pressure gradient, and in turn influencing the advection-diffusion-permeation interplay that governs flow-mediated transport.

## 4.3 Performance of the fictitious domain framework

While mathematical details of the fictitious domain methodology have been outlined in prior work [31], we briefly discuss two key performance aspects here. First, the fictitious domain contribution is abstracted as a sequence of mutually independent inside-outside checks based on discrete particle data. This operation can be easily parallelized based on broadcast communication of discrete particle data across multiple processors over which the mesh is partitioned. Additionally, the background mesh is significantly less complicated than the case where each individual thrombus pore space is explicitly resolved. This makes mesh partitioning and load balancing substantially less complicated, and native partitioning and parallelization capabilities of solver libraries can be easily availed for implementing our proposed method. This simulation study extensively leveraged this ease of parallel implementation using the open source finite element library FEniCS [1]. Second, the mathematical details of the fictitious domain interaction term  $a_{int}(\mathbf{u}, \mathbf{w})_{\Omega}$  in Equation 1 needs some attention. As per the formulation, this interaction term  $a_{int}$  resides only on the space of the quadrature points during the finite element assembly operation; and during integration,  $a_{int}$  is evaluated at each quadrature point directly. However, the integration can also be performed by evaluating  $a_{int}$  at element nodes and using Galerkin interpolation of the resulting nodal contributions. In mathematical terms, the former involves



evaluating the interaction integrand  $F(\mathbf{x})$ , say, as:  $\sum_i w_i F(\mathbf{x}(\boldsymbol{\eta}_i))$  with  $i$  indicating the index of quadrature point,  $w_i$  being the quadrature weights, and  $\boldsymbol{\eta}$  denoting the quadrature point coordinates in the global finite element coordinate system. The latter involves the following:  $\sum_i w_i \sum_j F_j \phi_j(\mathbf{x}(\boldsymbol{\eta}_i))$ , where  $j$  indicates the nodal index, and  $\phi$  denotes the nodal basis functions. Based on the mathematical formulation of our method, the first integration method is more accurate. For this study we evaluated both implementations, and found minor differences in the large-scale flow structures between the two versions (see Figure S4 for an illustration of micro-scale differences due to implementation choice.)

#### 4.4 Assumptions and limitations

The computational framework and the simulation study presented here have a few key underlying assumptions and limitations. First, we have considered a 2-dimensional geometry, and the flow-domain is in form of a channel. This assumption enabled a few advantages. The 2-dimensional computations are substantially less expensive than 3-dimensional models, thereby helping conduct a larger cohort of simulations for the systematic parametric variations we have reported here. In addition, keeping the flow-domain geometry simple helped control against added vortical structures originating from curvature induced secondary circulation, making sure thereby that any macroscale flow features and FTLE structures observed were solely due to thrombus interactions with unsteady pulsatile flow. We acknowledge that extending our simulation framework to account for 3-dimensional, and anatomically derived, geometries is a critical next step, and we are currently expanding our efforts in that direction. A second, and somewhat related, limitation is (as stated in Section 4.1) that the thrombus was treated as an already formed non-deformable aggregate. The investigation of thrombus growth was not the focus here since it is a phenomenon of considerable importance and complexity requiring a separate and dedicated discussion of its own. Within the context of a macroscale thrombus that has already formed, the no-deformation assumption needs some justification. Physiologically, thrombus aggregate formation is followed by a phase of retraction and thrombus consolidation [9,34,11], which renders a stable and compact structure to the thrombus [25]. Owing to consolidation, thus, the thrombus can be assumed to undergo small deformations at the macroscopic scale, which are negligible in comparison with other dominant flow phenomena. Finally, while the thrombus shapes were obtained based on experimental data [12], the microstructure and leakage values could not be equivalently derived from known experiments within the scope of this study. This was primarily due to relatively sparse availability of well characterized, fine-grained data for these parameters for integration into large-scale computations. This constitutes an area of independent investigation we are currently pursuing. Our interests include incorporating additional information on clot microstructural heterogeneities including known core-shell architectures of hemostatic plugs [43] and finer scale structural information of fibrin networks as studied in prior works [10,51]. We remark that our hybrid particle-continuum approach poses no inherent complications in terms of integrating anatomical geometries and detailed thrombus microstructure and composition data. In fact, particularly for microstructural data, the flexibility of representing arbitrary shape and microstructure is a major advantage of our particle-continuum approach.

#### 4.5 Broader implications

The computational approach and data described in this study have broader implications in terms of thrombosis disease progression and treatment. Precise characterization of flow-mediated transport in the thrombus environment is critical for understanding thrombolytic drug transport and subsequent thrombolytic therapy efficacy. Transport of coagulation agonists like ADP and Thromboxane released from platelets bound to the thrombus also play a role in further thrombus deposition. Comprehensive evaluation of unsteady blood flow is also critical for assessment of flow induced loading on a thrombus and consequent thrombus fragmentation and embolization. Embolization, in particular, can cause significant complications in stroke therapy, leading to unexpected neurovascular incidents and reducing treatment efficacy. Detailed flow quantification also enables local mechanical strain and shear forces as discussed in Section 3.3. Platelets exposed to shear-loading and mechanical strain, may undergo mechanical activation, contributing further to thrombosis disease phenomena. Finally, our framework specifically addresses the need for efficient handling of arbitrary thrombus

shape and microstructures representative of realistic thrombus, which is critical for advancing state-of-the-art in *in silico* analysis of thrombotic phenomena.

## 5 Concluding Remarks

We have described a parametric simulation based study on blood flow and flow-mediated transport in the neighborhood of a thrombus in arterial flow environment. The study was based on a hybrid particle-continuum fictitious domain finite element computational framework, which we have devised in prior work. The framework enabled rapid parametric variations in thrombus microstructure for a fixed thrombus shape and size. For varying thrombus shape, microstructure, and extent of wall leakage, we evaluated: (a) the unsteady flow patterns emerging from pulsatile viscous flow interactions with the thrombus domain; (b) pressure-gradient across the thrombus boundary which drives permeation; and (c) the dynamic coherent structures identifiable from the finite time Lyapunov exponent (FTLE) field which organizes advective mass transport around the thrombus. The results from the simulation illustrated how shape, microstructure, and wall status influence flow and transport in thrombus neighborhood. The results and inferences also helped generate a unified understanding of the balance between advection, diffusion, and permeation in determining flow-mediated transport around a thrombus.

## 6 Conflicts of Interest

The Authors declare no conflicts of interest pertaining to the research presented here.

## 7 Acknowledgements

This work was partly supported by the American Heart Association (Award: 16POST27500023) and the Burroughs Wellcome Fund (Award: 1016360). This work utilized resources from the University of Colorado Boulder Research Computing Group, which is supported by the National Science Foundation (awards ACI-1532235 and ACI-1532236), the University of Colorado Boulder, and Colorado State University. The Authors also gratefully acknowledge guidance, support, and the many valuable discussions with Prof. Scott L. Diamond, Department of Chemical and Biomolecular Engineering, University of Pennsylvania. These fruitful discussions strongly benefited the study design and interpretation of results. CT performed the flow simulations, data analysis, and contributed towards manuscript content. ZI performed Lagrangian computations and data analysis. DM developed the numerical methods and computer libraries, designed the study, and wrote the manuscript. SCS contributed key inputs to finalize study design, and simulation data analysis and interpretation. All authors reviewed the manuscript and agreed to the final version.

## References

- [1] M. Alnæs, J. Blechta, J. Hake, A. Johansson, B. Kehlet, A. Logg, C. Richardson, J. Ring, M. Rognes, and G. Wells. The fenics project version 1.5. *Archive of Numerical Software*, 3(100):9–23, 2015.
- [2] F. Bajd and I. Serša. Mathematical modeling of blood clot fragmentation during flow-mediated thrombolysis. *Biophysical journal*, 104(5):1181–1190, 2013.
- [3] D. Bark, A. Para, and D. Ku. Correlation of thrombosis growth rate to pathological wall shear rate during platelet accumulation. *Biotechnology and bioengineering*, 109(10):2642–2650, 2012.
- [4] M. Berndt, B. Friedrich, C. Maegerlein, S. Moench, D. Hedderich, M. Lehm, C. Zimmer, A. Straeter, H. Poppert, S. Wunderlich, et al. Thrombus permeability in admission computed tomographic imaging indicates stroke pathogenesis based on thrombus histology. *Stroke*, 49(11):2674–2682, 2018.
- [5] L. F. Brass and S. L. Diamond. Transport physics and biorheology in the setting of hemostasis and thrombosis. *Journal of Thrombosis and Haemostasis*, 14(5):906–917, 2016.
- [6] W. Breugem, B. Boersma, and R. Uittenbogaard. The laminar boundary layer over a permeable wall. *Transport in porous media*, 59(3):267–300, 2005.
- [7] A. Brooks and T. Hughes. Streamline upwind/petrov-galerkin formulations for convection dominated flows with particular emphasis on the incompressible navier-stokes equations. *Computer methods in applied mechanics and engineering*, 32(1-3):199–259, 1982.
- [8] B. Cabral and L. Leedom. Imaging vector fields using line integral convolution. In *Proceedings of the 20th annual conference on Computer graphics and interactive techniques*, pages 263–270. ACM, 1993.
- [9] S. Calaminus, J. Auger, O. McCarty, M. Wakelam, L. Machesky, and S. Watson. Myosiniia contractility is required for maintenance of platelet structure during spreading on collagen and contributes to thrombus stability. *Journal of Thrombosis and Haemostasis*, 5(10):2136–2145, 2007.
- [10] J. Chen, O. V. Kim, R. I. Litvinov, J. W. Weisel, M. S. Alber, and D. Z. Chen. An automated approach for fibrin network segmentation and structure identification in 3d confocal microscopy images. In *2014 IEEE 27th International Symposium on Computer-Based Medical Systems*, pages 173–178. IEEE, 2014.
- [11] D. Cines, T. Lebedeva, C. Nagaswami, V. Hayes, W. Masefski, R. Litvinov, L. Rauova, T. Lowery, and J. Weisel. Clot contraction: compression of erythrocytes into tightly packed polyhedra and redistribution of platelets and fibrin. *Blood*, 123(10):1596–1603, 2014.
- [12] T. Colace, R. Muthard, and S. Diamond. Thrombus growth and embolism on tissue factor-bearing collagen surfaces under flow. *Arteriosclerosis, thrombosis, and vascular biology*, 32(6):1466–1476, 2012.
- [13] S. L. Diamond. Engineering design of optimal strategies for blood clot dissolution. *Annual review of biomedical engineering*, 1(1):427–461, 1999.
- [14] M. Flamm and S. Diamond. Multiscale systems biology and physics of thrombosis under flow. *Annals of biomedical engineering*, 40(11):2355–2364, 2012.
- [15] A. L. Fogelson and K. B. Neeves. Fluid mechanics of blood clot formation. *Annual review of fluid mechanics*, 47:377–403, 2015.
- [16] L. Franca, S. Frey, and T. Hughes. Stabilized finite element methods: I. application to the advective-diffusive model. *Computer Methods in Applied Mechanics and Engineering*, 95(2):253–276, 1992.
- [17] S. Gogia and S. Neelamegham. Role of fluid shear stress in regulating vwf structure, function and related blood disorders. *Biorheology*, 52(5-6):319–335, 2015.

- [18] D. A. Gorog, Z. A. Fayad, and V. Fuster. Arterial thrombus stability: does it matter and can we detect it? *Journal of the American College of Cardiology*, 70(16):2036–2047, 2017.
- [19] G. Haller. Lagrangian coherent structures. *Annual Review of Fluid Mechanics*, 47:137–162, 2015.
- [20] J. Hathcock. Flow effects on coagulation and thrombosis. *Arteriosclerosis, thrombosis, and vascular biology*, 26(8):1729–1737, 2006.
- [21] I. Jaffer, J. Fredenburgh, J. Hirsh, and J. Weitz. Medical device-induced thrombosis: what causes it and how can we prevent it? *Journal of Thrombosis and Haemostasis*, 13(S1):S72–S81, 2015.
- [22] D. N. Kenwright and D. A. Lane. Interactive time-dependent particle tracing using tetrahedral decomposition. *IEEE Transactions on Visualization and Computer Graphics*, 2(2):120–129, 1996.
- [23] H. Kim, I. Vignon-Clementel, C. Figueroa, J. LaDisa, K. Jansen, J. Feinstein, and C. Taylor. On coupling a lumped parameter heart model and a three-dimensional finite element aorta model. *Annals of biomedical engineering*, 37(11):2153–2169, 2009.
- [24] O. V. Kim, Z. Xu, E. D. Rosen, and M. S. Alber. Fibrin networks regulate protein transport during thrombus development. *PLoS computational biology*, 9(6), 2013.
- [25] W. Lam, O. Chaudhuri, A. Crow, K. Webster, T. Li, A. Kita, J. Huang, D. Fletcher, et al. Mechanics and contraction dynamics of single platelets and implications for clot stiffening. *Nature materials*, 10(1):61–66, 2011.
- [26] S. Lee, L. Antiga, J. Spence, and D. Steinman. Geometry of the carotid bifurcation predicts its exposure to disturbed flow. *Stroke*, 39(8):2341–2347, 2008.
- [27] K. Leiderman and A. Fogelson. Grow with the flow: a spatial–temporal model of platelet deposition and blood coagulation under flow. *Mathematical Medicine and Biology*, 28(1):47–84, 2011.
- [28] K. Leiderman and A. Fogelson. An overview of mathematical modeling of thrombus formation under flow. *Thrombosis research*, 133:S12–S14, 2014.
- [29] D. Liu and J. Yu. Otsu method and k-means. In *2009 Ninth International Conference on Hybrid Intelligent Systems*, volume 1, pages 344–349. IEEE, 2009.
- [30] M. Mirramezani, B. Herbig, T. Stalker, L. Netter, M. Cooper, J. Weisel, S. Diamond, T. Sinno, L. Brass, S. Shadden, et al. Platelet packing density is an independent regulator of the hemostatic response to injury. *Journal of Thrombosis and Haemostasis*, 16(5):973–983, 2018.
- [31] D. Mukherjee and S. C. Shadden. Modeling blood flow around a thrombus using a hybrid particle–continuum approach. *Biomechanics and Modeling in Mechanobiology*, 17(3):645–663, 2018.
- [32] R. W. Muthard and S. L. Diamond. Blood clots are rapidly assembled hemodynamic sensors: flow arrest triggers intraluminal thrombus contraction. *Arteriosclerosis, thrombosis, and vascular biology*, 32(12):2938–2945, 2012.
- [33] W. Nesbitt, E. Westein, F. Tovar-Lopez, E. Tolouei, A. Mitchell, J. Fu, J. Carberry, A. Fouras, and S. Jackson. A shear gradient–dependent platelet aggregation mechanism drives thrombus formation. *Nature medicine*, 15(6):665–673, 2009.
- [34] A. Ono, E. Westein, S. Hsiao, W. Nesbitt, J. Hamilton, S. Schoenwaelder, and S. Jackson. Identification of a fibrin-independent platelet contractile mechanism regulating primary hemostasis and thrombus growth. *Blood*, 112(1):90–99, 2008.
- [35] N. Otsu. A threshold selection method from gray-level histograms. *IEEE transactions on systems, man, and cybernetics*, 9(1):62–66, 1979.

- [36] A. Piebalgs, B. Gu, D. Roi, K. Lobotesis, S. Thom, and X. Y. Xu. Computational simulations of thrombolytic therapy in acute ischaemic stroke. *Scientific reports*, 8(1):1–13, 2018.
- [37] I. Pivkin, P. Richardson, and G. Karniadakis. Blood flow velocity effects and role of activation delay time on growth and form of platelet thrombi. *Proceedings of the National Academy of Sciences*, 103(46):17164–17169, 2006.
- [38] H. Schlichting and K. Gersten. *Boundary-layer theory*. Springer, 2016.
- [39] S. Shadden. Lagrangian coherent structures. In R. Grigoriev, editor, *Transport and Mixing in Laminar Flows: From Microfluidics to Oceanic Currents*, chapter 3, pages 59–89. Wiley-VCH Verlag GmbH and Co. KGaA, 2011.
- [40] S. C. Shadden and S. Hendabadi. Potential fluid mechanic pathways of platelet activation. *Biomechanics and modeling in mechanobiology*, 12(3):467–474, 2013.
- [41] S. C. Shadden and C. A. Taylor. Characterization of coherent structures in the cardiovascular system. *Annals of biomedical engineering*, 36(7):1152–1162, 2008.
- [42] S. C. Shadden, F. Lekien, and J. E. Marsden. Definition and properties of lagrangian coherent structures from finite-time lyapunov exponents in two-dimensional aperiodic flows. *Physica D: Nonlinear Phenomena*, 212(3-4):271–304, 2005.
- [43] T. J. Stalker, J. D. Welsh, M. Tomaiuolo, J. Wu, T. V. Colace, S. L. Diamond, and L. F. Brass. A systems approach to hemostasis: 3. thrombus consolidation regulates intrathrombus solute transport and local thrombin activity. *Blood, The Journal of the American Society of Hematology*, 124(11):1824–1831, 2014.
- [44] C. R. Sweet, S. Chatterjee, Z. Xu, K. Bisordi, E. D. Rosen, and M. Alber. Modelling platelet–blood flow interaction using the subcellular element langevin method. *Journal of The Royal Society Interface*, 8(65):1760–1771, 2011.
- [45] N. Tilton and L. Cortelezzi. Stability of boundary layers over porous walls with suction. *AIAA Journal*, 53(10):2856–2868, 2015.
- [46] M. Tomaiuolo, T. Stalker, J. Welsh, S. Diamond, T. Sinno, and L. Brass. A systems approach to hemostasis: 2. computational analysis of molecular transport in the thrombus microenvironment. *Blood*, 124(11):1816–1823, 2014.
- [47] M. Tomaiuolo, L. F. Brass, and T. J. Stalker. Regulation of platelet activation and coagulation and its role in vascular injury and arterial thrombosis. *Interventional cardiology clinics*, 6(1):1, 2017.
- [48] S. Van der Walt, J. L. Schönberger, J. Nunez-Iglesias, F. Boulogne, J. D. Warner, N. Yager, E. Gouillart, and T. Yu. scikit-image: image processing in python. *PeerJ*, 2:e453, 2014.
- [49] I. Vignon-Clementel, C. Figueroa, K. Jansen, and C. Taylor. Outflow boundary conditions for three-dimensional finite element modeling of blood flow and pressure in arteries. *Computer methods in applied mechanics and engineering*, 195(29):3776–3796, 2006.
- [50] S. S. Virani, A. Alonso, E. J. Benjamin, M. S. Bittencourt, C. W. Callaway, A. P. Carson, A. M. Chamberlain, A. R. Chang, S. Cheng, F. N. Delling, et al. Heart disease and stroke statistics—2020 update: a report from the american heart association. *Circulation*, pages E139–E596, 2020.
- [51] J. W. Weisel and R. I. Litvinov. Fibrin formation, structure and properties. In *Fibrous proteins: structures and mechanisms*, pages 405–456. Springer, 2017.

- [52] J. D. Welsh, T. J. Stalker, R. Voronov, R. W. Muthard, M. Tomaiuolo, S. L. Diamond, and L. F. Brass. A systems approach to hemostasis: 1. the interdependence of thrombus architecture and agonist movements in the gaps between platelets. *Blood, The Journal of the American Society of Hematology*, 124(11):1808–1815, 2014.
- [53] A. M. Wendelboe and G. E. Raskob. Global burden of thrombosis: epidemiologic aspects. *Circulation research*, 118(9):1340–1347, 2016.
- [54] A. S. Wolberg. Thrombin generation and fibrin clot structure. *Blood reviews*, 21(3):131–142, 2007.
- [55] D. M. Wootton and D. N. Ku. Fluid mechanics of vascular systems, diseases, and thrombosis. *Annual review of biomedical engineering*, 1(1):299–329, 1999.
- [56] A. Wufsus, N. Macera, and K. Neeves. The hydraulic permeability of blood clots as a function of fibrin and platelet density. *Biophysical journal*, 104(8):1812–1823, 2013.
- [57] Z. Xu, N. Chen, M. Kamocka, E. Rosen, and M. Alber. A multiscale model of thrombus development. *Journal of the Royal Society Interface*, 5(24):705–722, 2008.
- [58] Z. Xu, N. Chen, S. C. Shadden, J. E. Marsden, M. M. Kamocka, E. D. Rosen, and M. Alber. Study of blood flow impact on growth of thrombi using a multiscale model. *Soft Matter*, 5(4):769–779, 2009.
- [59] A. Yazdani, H. Li, J. D. Humphrey, and G. E. Karniadakis. A general shear-dependent model for thrombus formation. *PLoS computational biology*, 13(1):e1005291, 2017.
- [60] C. Zhang and S. Neelamegham. Application of microfluidic devices in studies of thrombosis and hemostasis. *Platelets*, 28(5):434–440, 2017.
- [61] X. Zheng, A. Yazdani, H. Li, J. D. Humphrey, and G. E. Karniadakis. A three-dimensional phase-field model for multiscale modeling of thrombus biomechanics in blood vessels. *PLoS computational biology*, 16(4):e1007709, 2020.
- [62] L. D. Zubairova, R. M. Nabiullina, C. Nagaswami, Y. F. Zuev, I. G. Mustafin, R. I. Litvinov, and J. W. Weisel. Circulating microparticles alter formation, structure and properties of fibrin clots. *Scientific reports*, 5(1):1–13, 2015.

## Figures

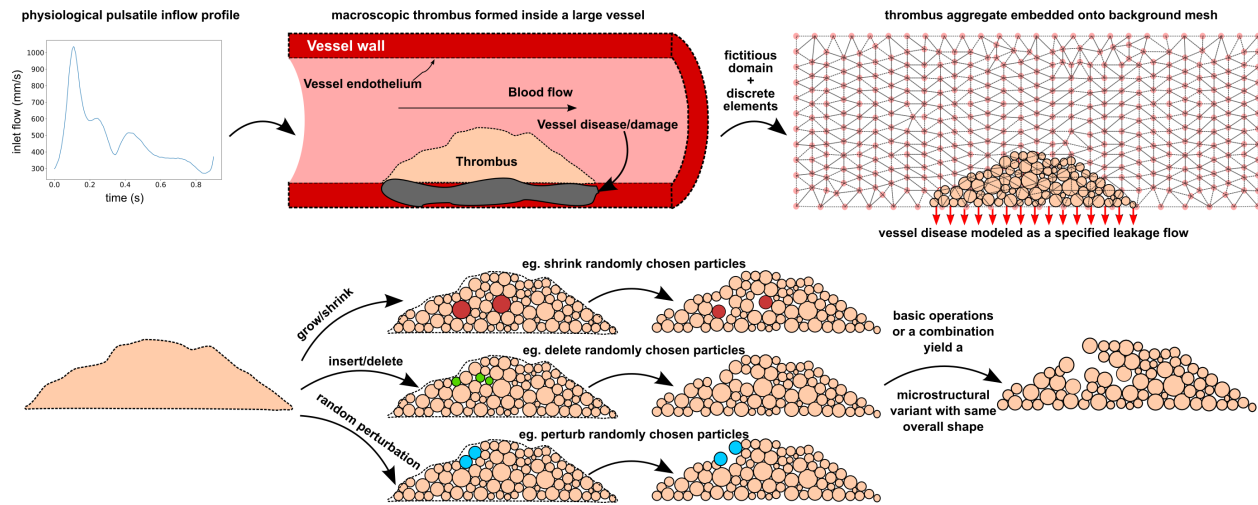

Figure 1: A schematic illustration of the various conceptual steps involved in the hybrid particle-continuum fictitious domain framework. The top panel illustrates the pulsatile inflow data, simulation domain configuration, and the fictitious domain approach with leakage boundary conditions to model wall disease. The bottom panel provides a cartoon illustration of the discrete particle based microstructural variation modeling.

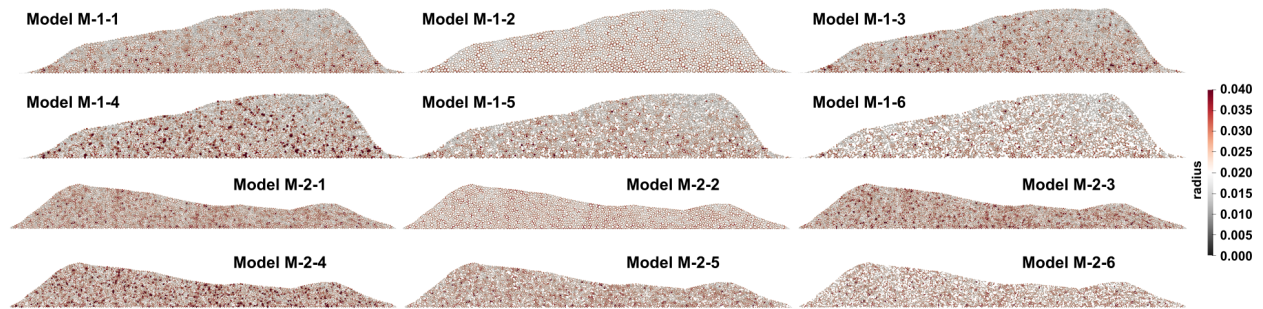

Figure 2: Illustration of all the 12 different thrombus models, derived from a combination of 2 thrombus model shapes (based on data in [12]) and 6 microstructural variations per model. Models are indexed using a naming scheme:  $M-i-j$ ; where  $i$  indicates the shape, and  $j$  indicates the microstructural variant. All models are colored by the size of the discrete elements or particles used to represent the microstructures.



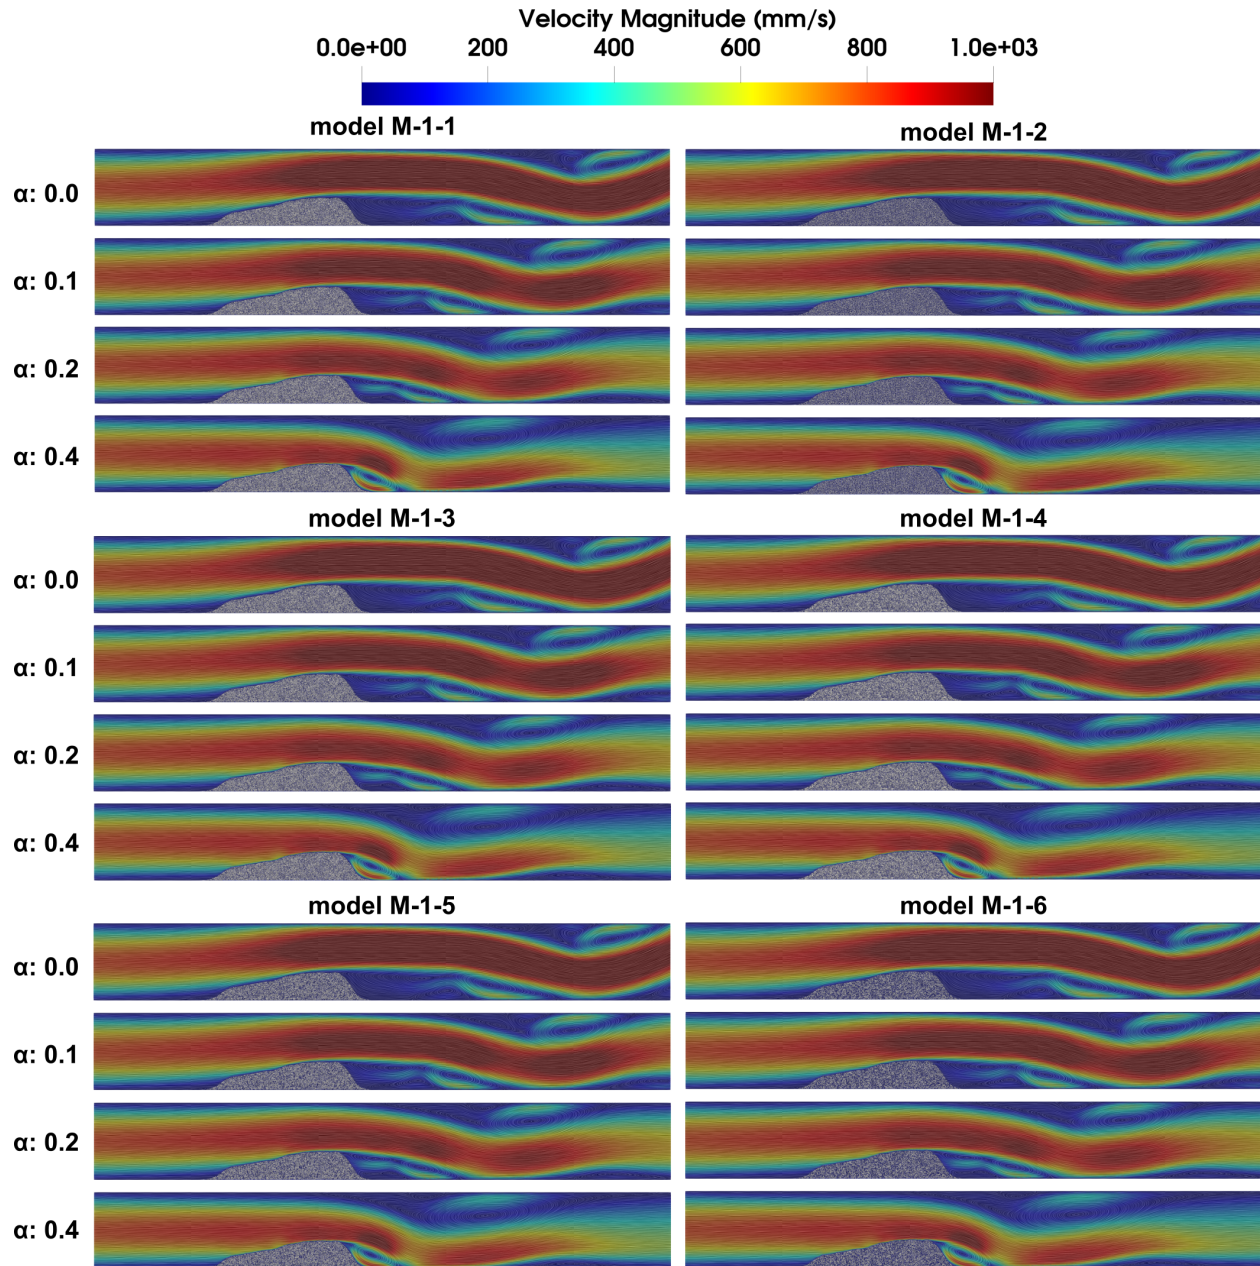

Figure 3: Flow velocity fields at peak systole for all parametric combinations for thrombus model 1 (that is, model id's M-1-x, x=1 - 6), visualized using line integration convolution (LIC) maps colored by velocity magnitude. For each thrombus shape-microstructure combination (M-1-x), the wall leakage parameters  $\alpha$  increases from top to bottom.

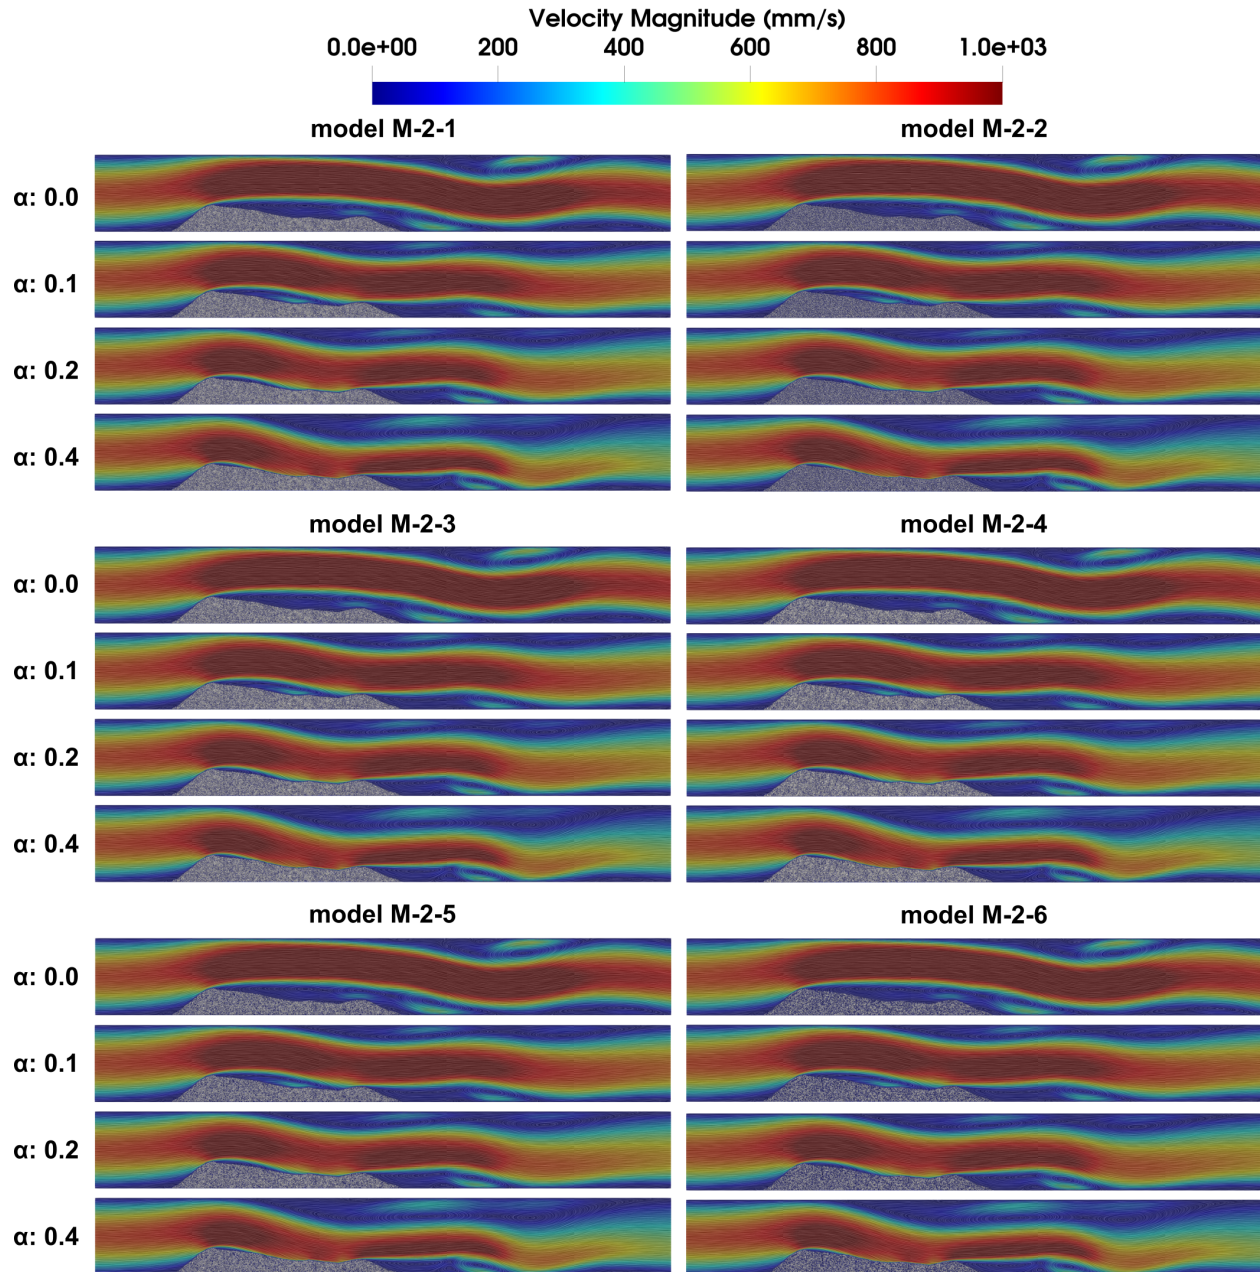

Figure 4: Flow velocity fields at peak systole for all parametric combinations for thrombus model 2 (that is, model id's M-2-x,  $x=1 - 6$ ), visualized using line integration convolution (LIC) maps colored by velocity magnitude. For each thrombus shape-microstructure combination (M-2-x), the wall leakage parameters  $\alpha$  increases from top to bottom.

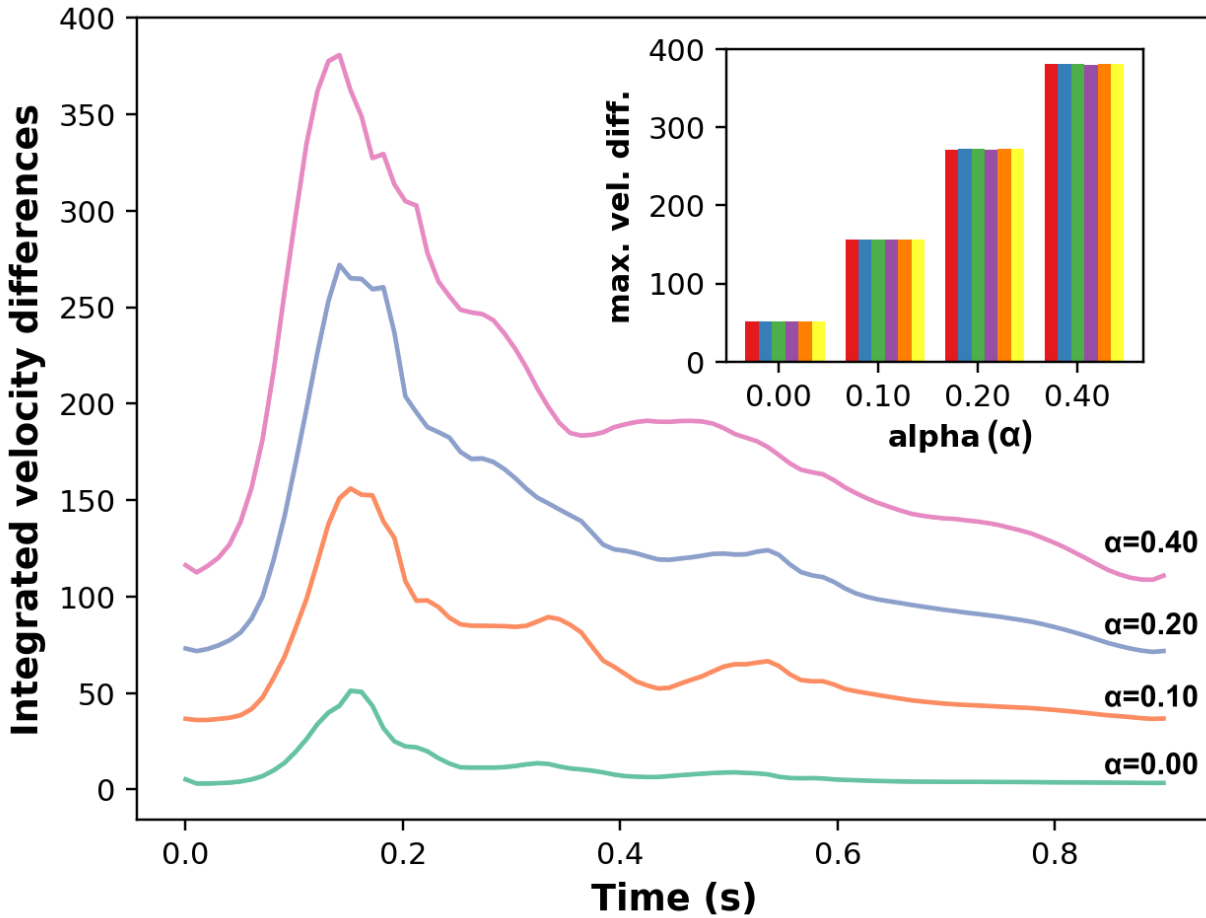

Figure 5: Differences in flow velocity fields around models  $M-1-x$  computed with respect to flow velocities around a rigid thrombus with impermeable walls and integrated over the entire flow domain. The main visual illustrates the variation in this integrated difference over time in one cardiac cycle for varying leakage parameter  $\alpha$ . The curves represent mean values computed across the 6 microstructural variants. Inset visual illustrates the maximum differences for varying leakage parameters across all microstructural variants, confirming the minor influence that microstructure has in comparison with wall leakage in affecting flow around a given thrombus shape. All data are in units of velocity mm/sec.

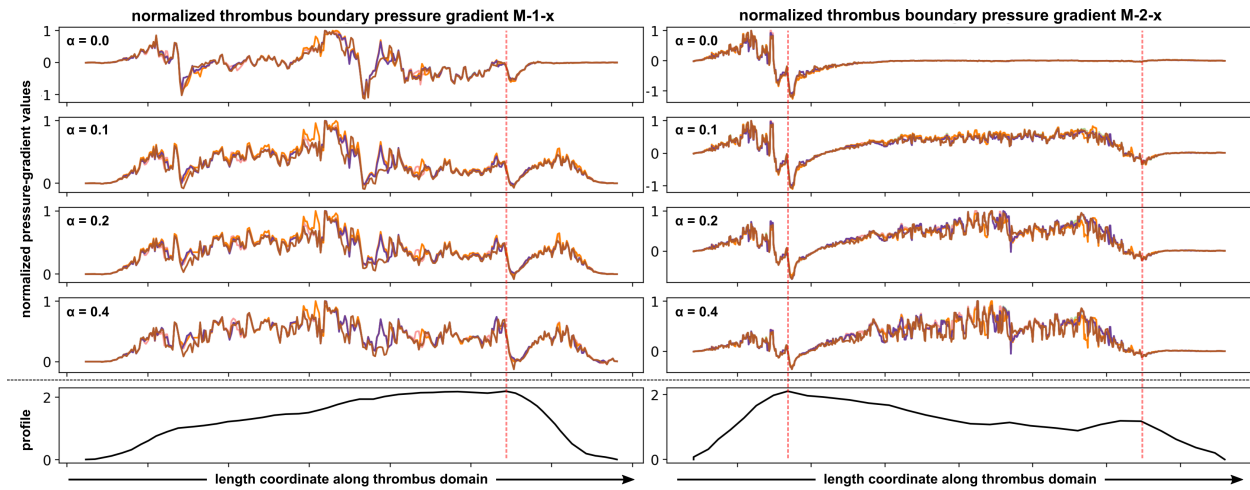

Figure 6: Normalized values of pressure-gradients normal to the thrombus boundary, computed along the entire boundary length for varying wall leakage parameter  $\alpha$ . Each plot shows the variation of the pressure gradient with varying microstructures. The two bottom columns represent the overall thrombus shape. Red dotted lines indicate locations of expected flow separation. Positive normalized pressure gradient values favor permeation of flow into the thrombus domain.

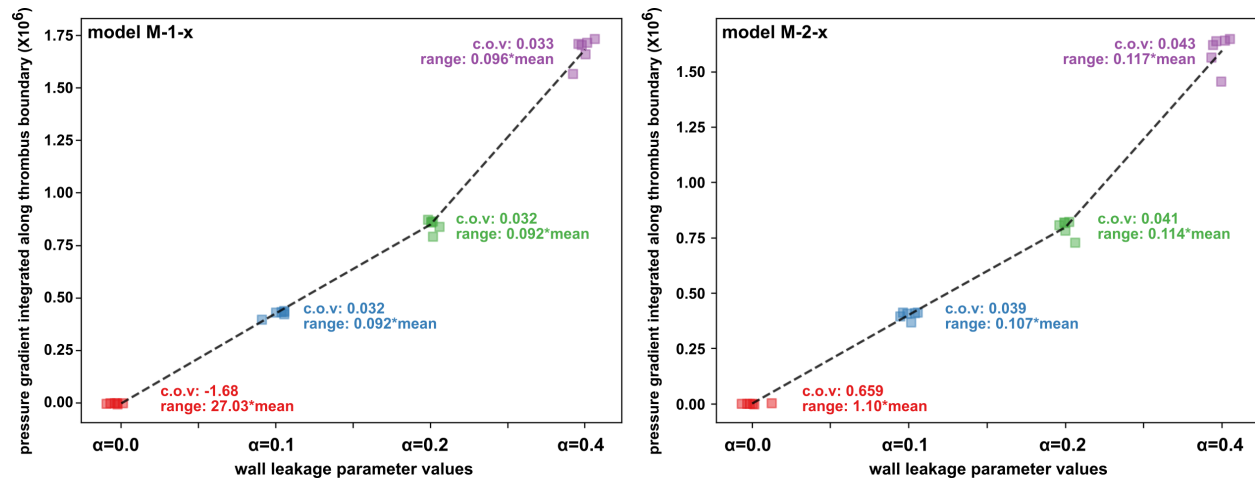

Figure 7: Variation of thrombus boundary pressure gradient integrated along the boundary, visualized against varying microstructures, and varying wall leakage parameter  $\alpha$ . Data for thrombus models M-1-x are shown on the left, and those for models M-2-x are shown on the right.

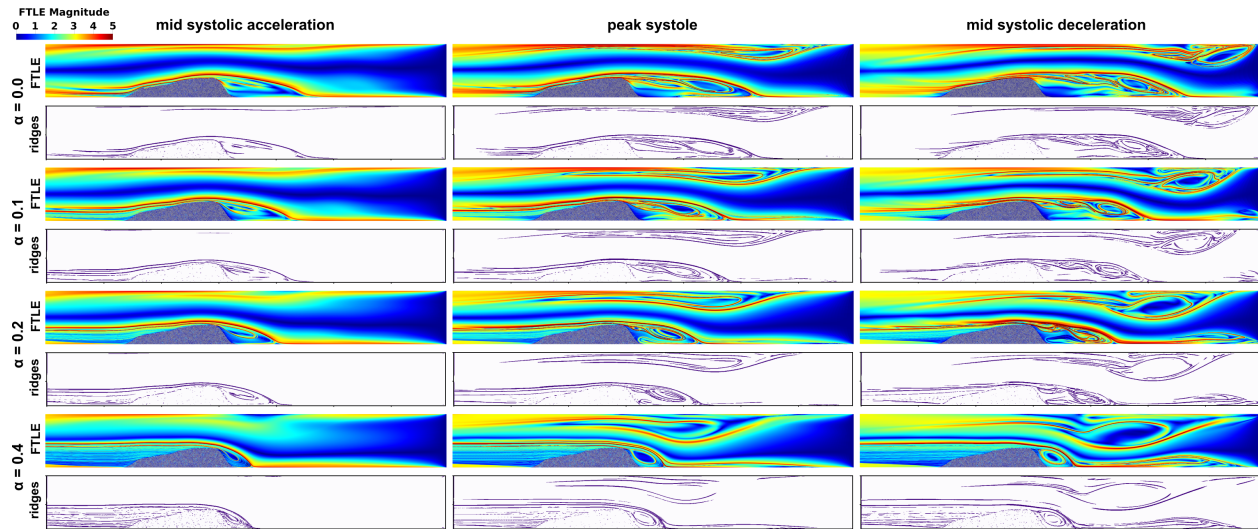

Figure 8: *Unsteady finite time Lyapunov exponent (FTLE) fields and coherent structures formed by FTLE ridges visualized for thrombus model 1 for increasing wall leakage parameter values. To illustrate the dynamic field, data at three instances in the cardiac cycle - mid systolic acceleration, peak systole, and mid systolic deceleration are presented. All data are from simulations with case M-1-1.*

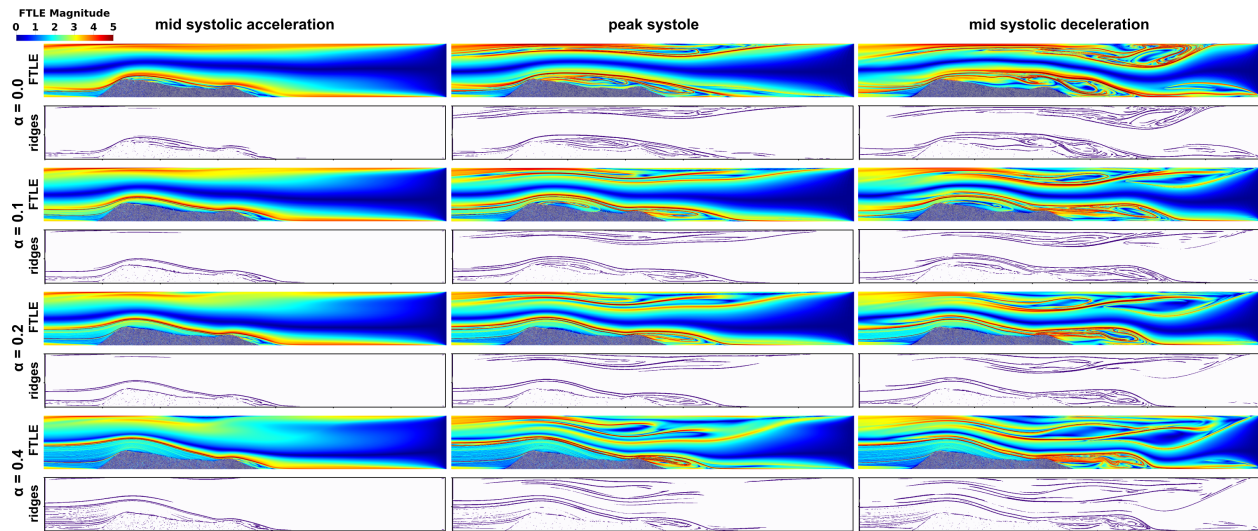

Figure 9: *Unsteady finite time Lyapunov exponent (FTLE) fields and coherent structures formed by FTLE ridges visualized for thrombus model 2 for increasing wall leakage parameter values. To illustrate the dynamic field, data at three instances in the cardiac cycle - mid systolic acceleration, peak systole, and mid systolic deceleration are presented. All data are from simulations with case M-2-1.*

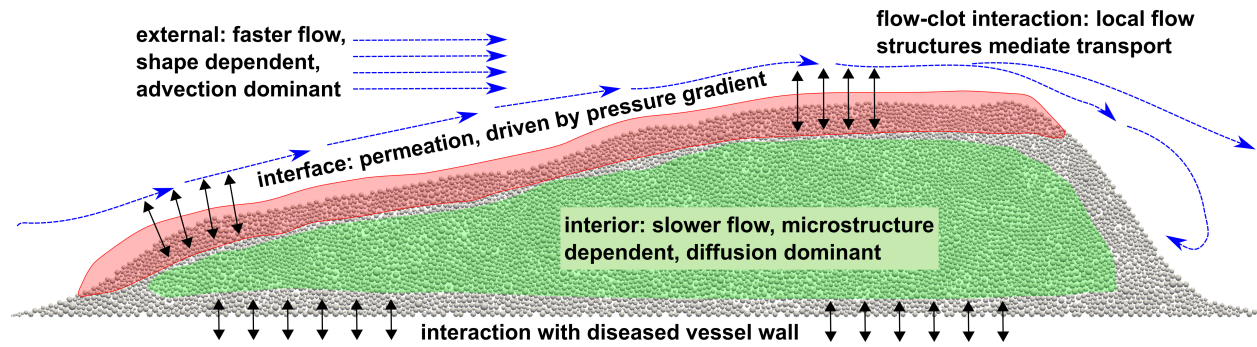

Figure 10: A schematic concept map derived based on data and observations from this study, that unifies the role of microstructure, shape, and wall disease or leakage in determining the three modalities of flow-mediated transport with and around a thrombus in an arterial hemodynamic environment - advection, diffusion, and permeation.
